# Supplementary material for: Development of the in vitro Cecal Chicken ALIMEntary tRact mOdel-2 to Study Microbiota Composition and Function
Source: PubMed Central journal article supplement (PMC8542841; doi:10.3389/fmicb.2021.726447), 2021-10-11
Supplement: Image_1.pdf [file Image_1.pdf]

Supplementary figures and tables\_CALIMERO-2 manuscript

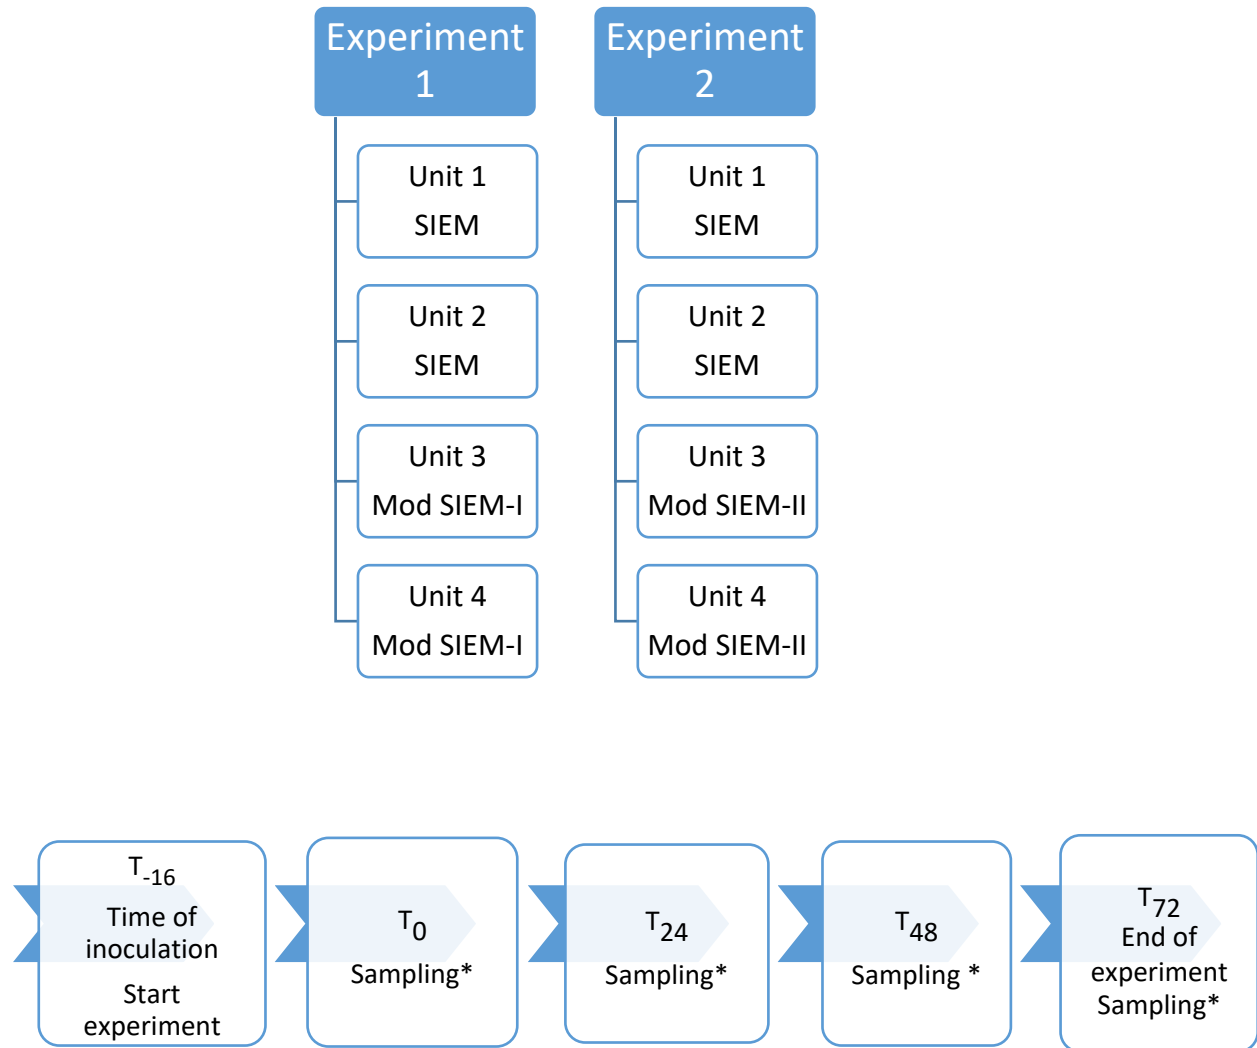

**Supplementary Figure 1. Flow chart of experimental set up of CALIMERO-2.** A. Experimental set up for the different sample types, SIEM, Modified SIEM-I and Modified SIEM-II. B. The experimental set up over time. At the times indicated by \* samples were taken from both the lumen and dialysate.
